# Supplementary material for: Parallel evolution of Pseudomonas aeruginosa phage resistance and virulence loss in response to phage treatment in vivo and in vitro
Source: eLife journal article supplement (doi:10.7554/elife.73679), 2022-02-21
Supplement: supp [file elife-73679-supp-v1.zip]

Archive with 8 entries (8 files):
- elife_poa_e73679_Transparent_Reporting_File.docx
- elife_poa_e73679_Figure_3_figure_supplement_1.pdf
- elife_poa_e73679_Figure_5_figure_supplement_1.pdf
- elife_poa_e73679_Figure_5_figure_supplement_2.pdf
- elife_poa_e73679_Supplementary_file_1.docx
- elife_poa_e73679_Supplementary_file_2.docx
- elife_poa_e73679_Supplementary_file_3.docx
- elife_poa_e73679_Supplementary_file_4.docx
