# Supplementary material for: Parallel evolution of Pseudomonas aeruginosa phage resistance and virulence loss in response to phage treatment in vivo and in vitro
Source: eLife journal article supplement (doi:10.7554/elife.73679), 2022-02-21
Supplement: supp [file elife-73679-supp-v1.zip › elife_poa_e73679_Supplementary_file_1.docx]

| Contrast | Estimate | SE | z-ratio | p-value |
| --- | --- | --- | --- | --- |
| Day 2 - Day 4 | - 16.5 | 10 | -1.65 | 0.2262 |
| Day 2 - Day 7 | - 16.5 | 10 | -1.65 | 0.2264 |
| Day 4 - Day 7 | 0.000001 | 5.32 | 0 | 1 |
