# Supplementary figures and images for: Parallel evolution of Pseudomonas aeruginosa phage resistance and virulence loss in response to phage treatment in vivo and in vitro
Source: eLife journal article supplement (doi:10.7554/elife.73679), 2022-02-21

(a) Replicate 1

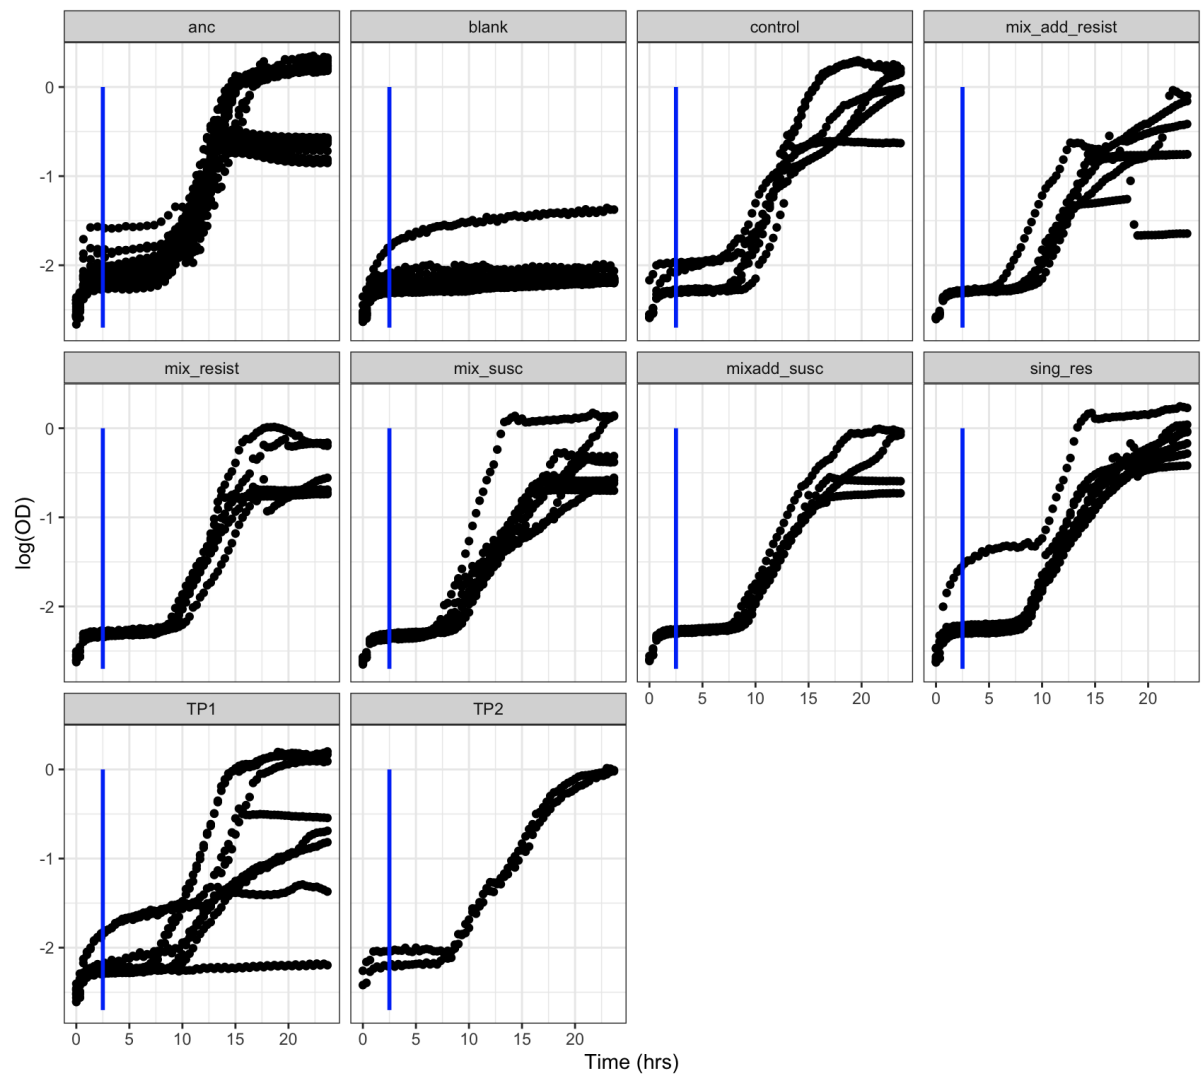

(b) Replicate 2

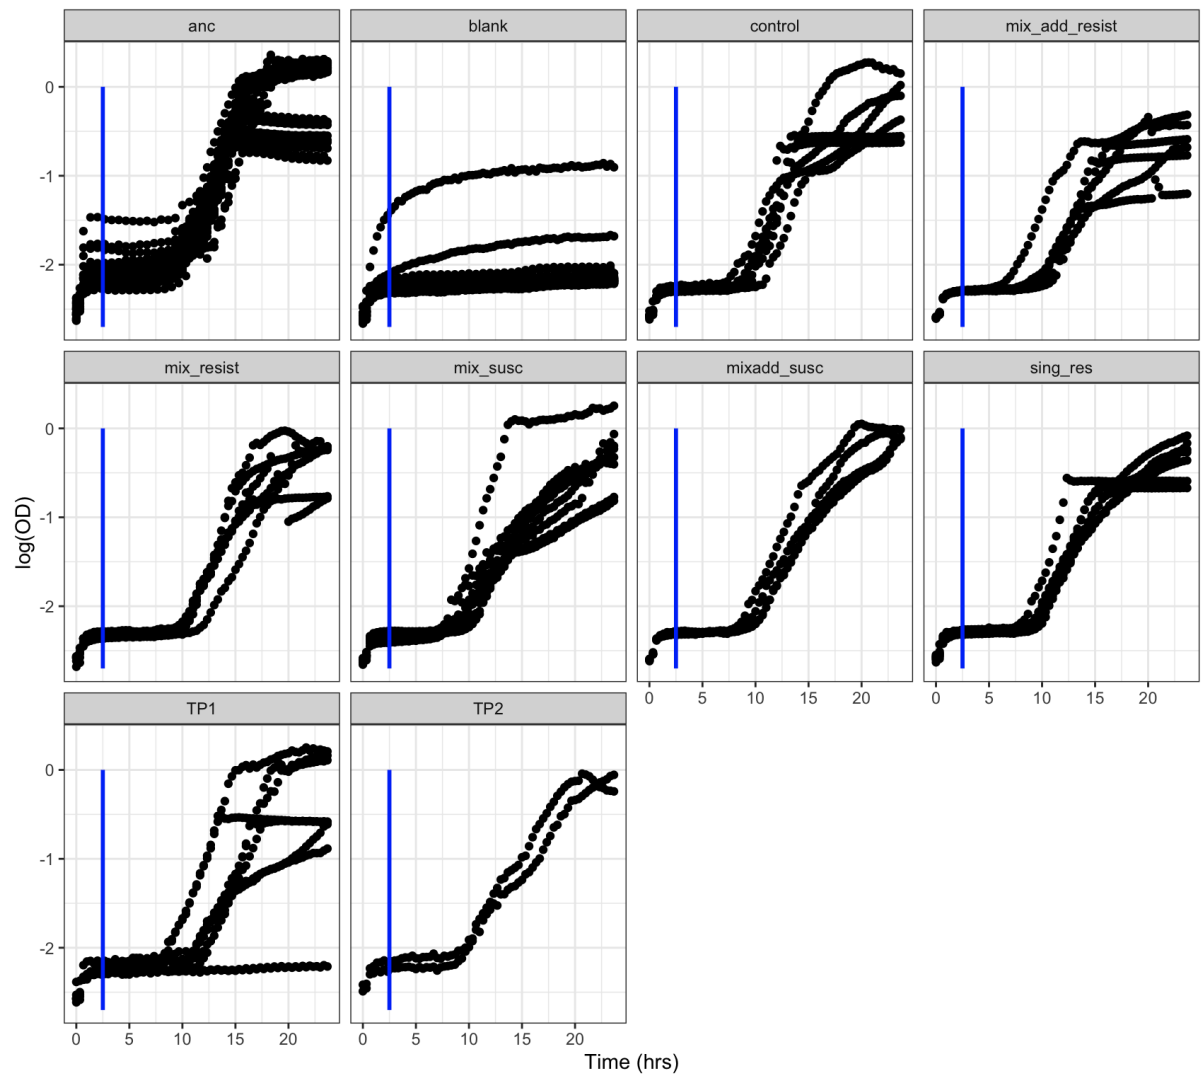

(c) Replicate 3

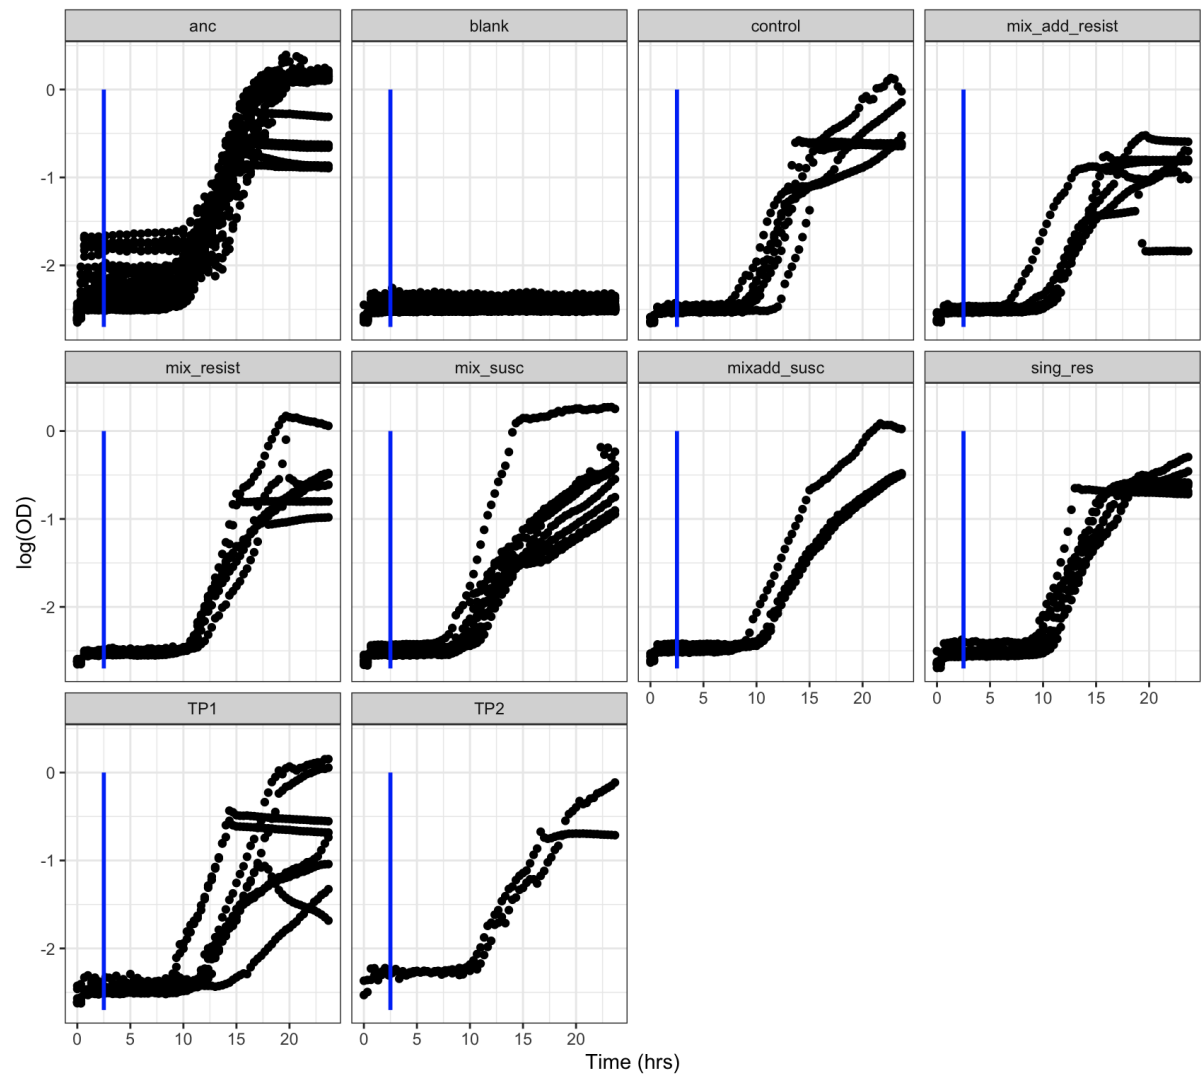

Supplement: supp [file elife-73679-supp-v1.zip › elife_poa_e73679_Figure_3_figure_supplement_1.pdf]

(a) NMDS of euclidean distances between genome changes of known and unknown function

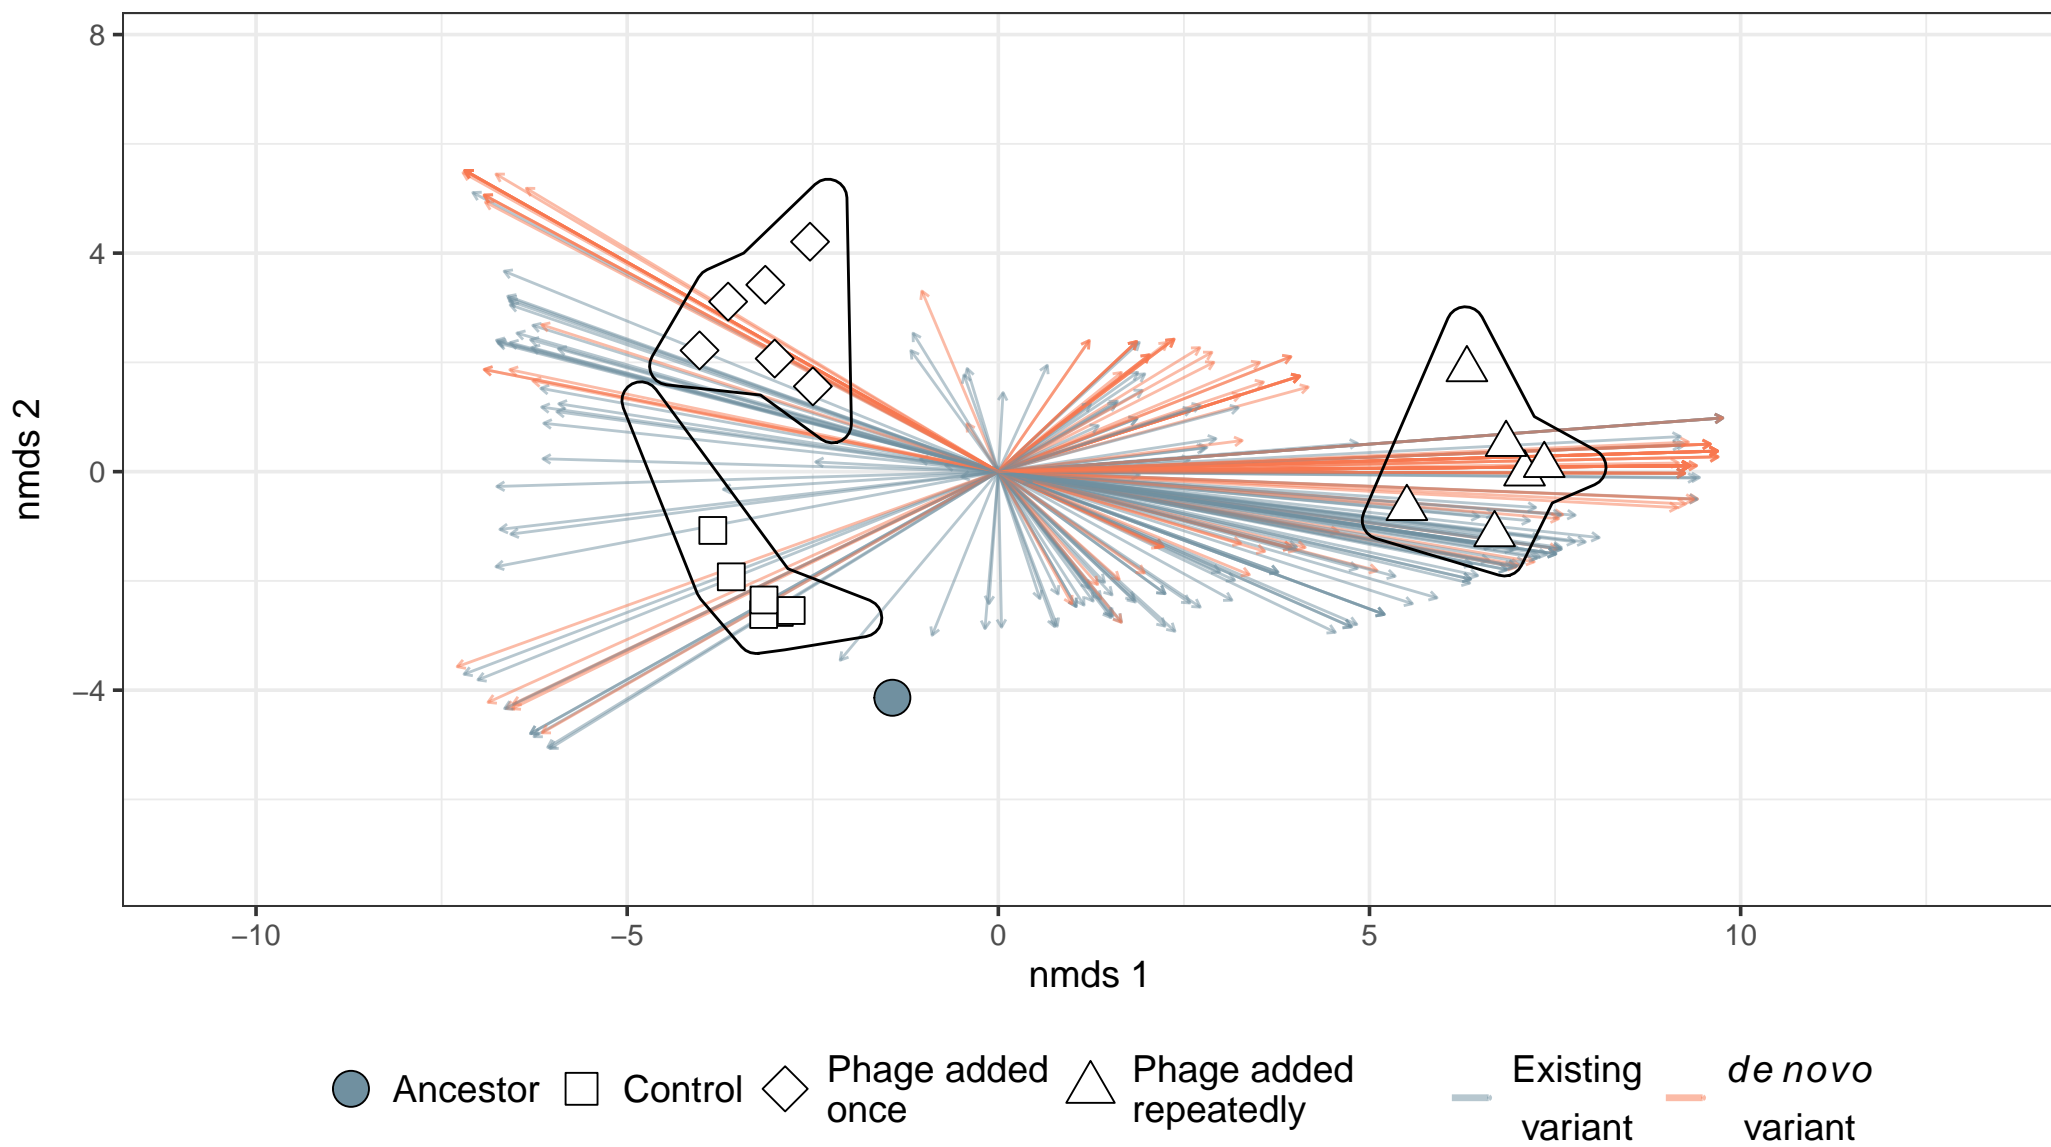

(b)

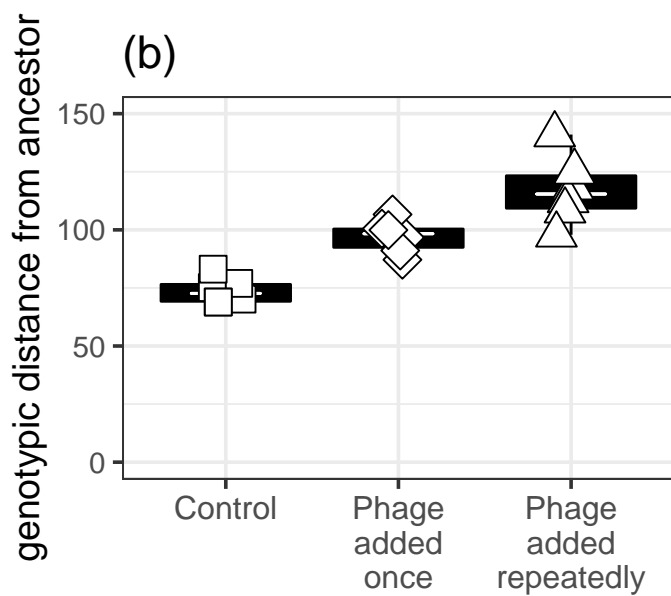

(c)

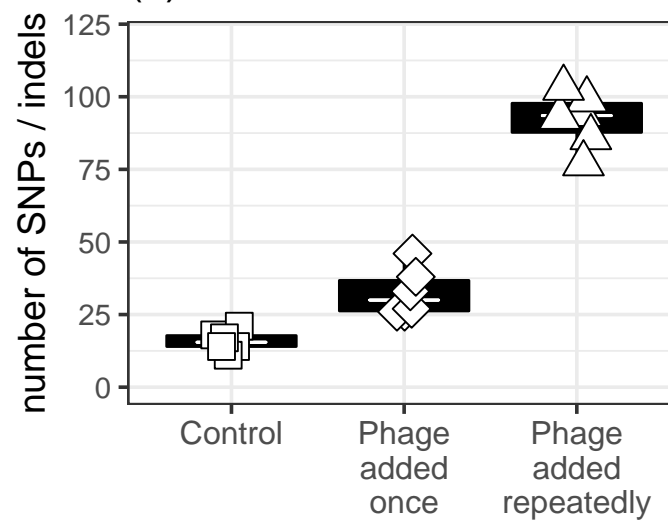

(d)

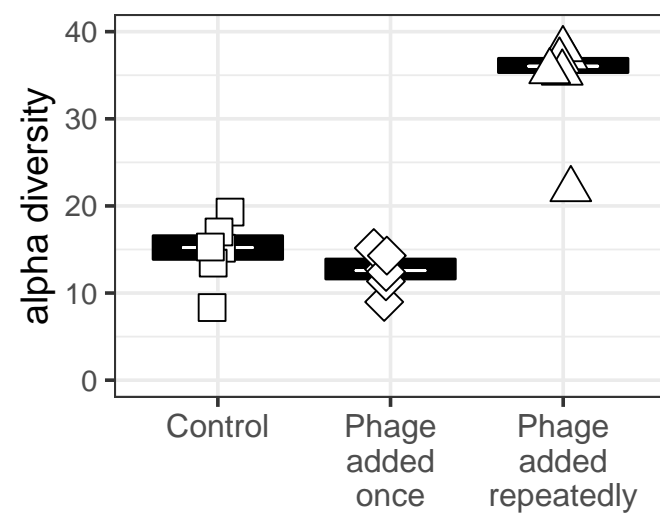

Supplement: supp [file elife-73679-supp-v1.zip › elife_poa_e73679_Figure_5_figure_supplement_1.pdf]

(b) Growth

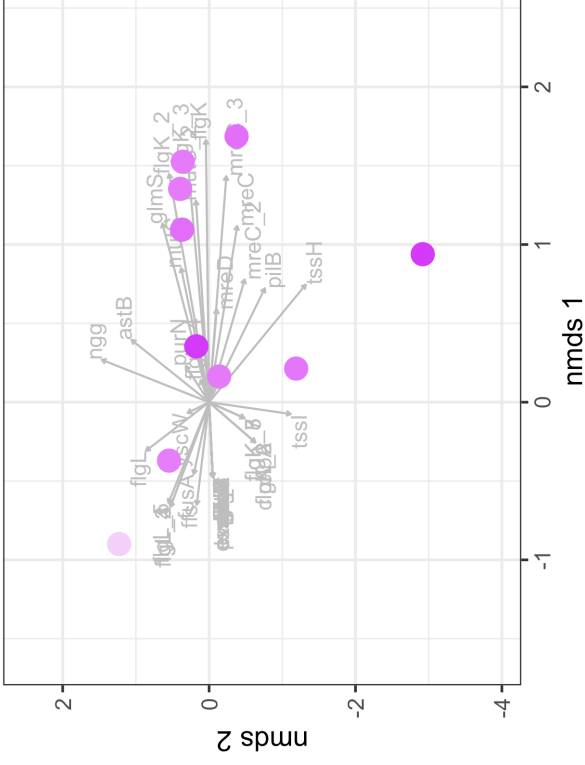

(d) Phage resistance

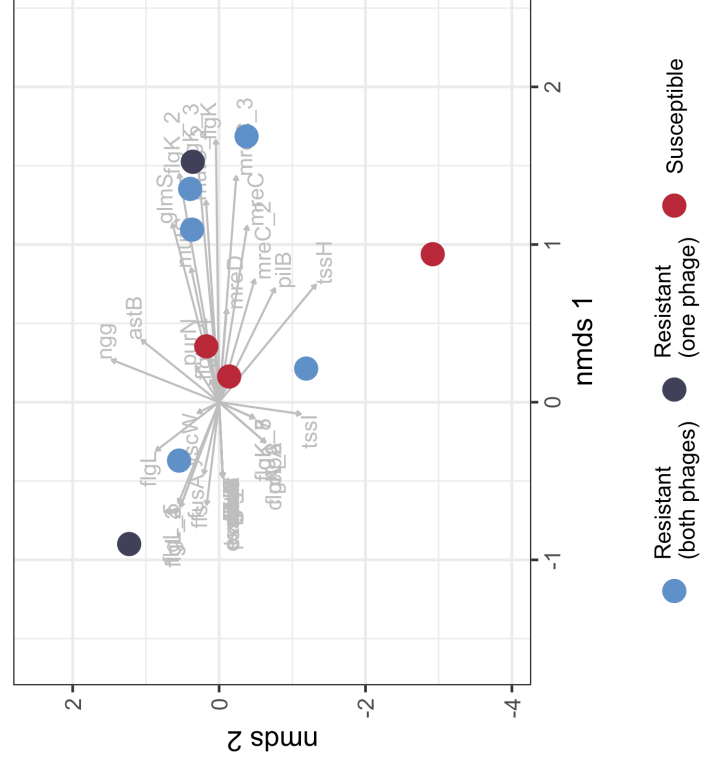

Supplement: supp [file elife-73679-supp-v1.zip › elife_poa_e73679_Figure_5_figure_supplement_2.pdf]
